# Supplementary material for: Predictors of Spontaneous and Systematically Assessed Suicidal Adverse Events in the Treatment of SSRI-Resistant Depression in Adolescents (TORDIA) Study
Source: Atypon-hosted journal article supplement (doi:10.1176/appi.ajp.2008.08070976), 2009-02-17

**To:** Michael D. Roy  
Executive Editor, The American Journal of Psychiatry

**From:** David A. Brent, MD  
Academic Chief, Child and Adolescent Psychiatry  
Western Psychiatric Hospital  
Endowed Chair in Suicide Studies  
Professor of Psychiatry, Pediatrics, and Epidemiology  
University of Pittsburgh School of Medicine

**Date:** 6/19/2019

**Re:** Brent, David A., et al. "Predictors of spontaneous and systematically assessed suicidal adverse events in the treatment of SSRI-resistant depression in adolescents (TORDIA) study." American Journal of Psychiatry 166.4 (2009): 418-426

---

The Suicidal Ideation Questionnaire- Jr. (Reynolds WM, Mazza JJ, 1999) consists of 15 items each scored on a seven-point scale from 0 ("I never had this thought") to 6 (Almost every day"). A total score ranging from 0 to 90 is calculated as the sum of each item. "Clinically significant" suicidal ideation is defined as a total score greater or equal to 31.

In our database, we incorrectly coded each item on a 1 to 7 scale, which inflated the total score by 15 points. Therefore, the means and the cut-point for "clinically significant" suicidal ideation we reported are incorrect. Corrections are below:

1) Page 419

*Reported:* "we report on the predictors of suicidal and nonsuicidal self-injury adverse events in the Treatment of SSRI Resistant Adolescent Depression (TORDIA) study, in which nearly 60% of participants who entered this clinical trial had clinically significant suicidal ideation"

*Corrected:* "we report on the predictors of suicidal and nonsuicidal self-injury adverse events in the Treatment of SSRI Resistant Adolescent Depression (TORDIA) study, in which nearly 40% of participants who entered this clinical trial had clinically significant suicidal ideation"

2) Page 421 - Table 1

*Reported*

|                                 | No Event<br>(N=266) |      | Ideation or<br>Attempt Only<br>(N=37) |      | Nonsuicidal<br>Self-Injury only<br>(N=20) |      | Ideation or<br>Attempt and<br>Nonsuicidal<br>Self-Injury<br>(N=11) |      | Analysis |       |        |
|---------------------------------|---------------------|------|---------------------------------------|------|-------------------------------------------|------|--------------------------------------------------------------------|------|----------|-------|--------|
|                                 | Mean                | SD   | Mean                                  | SD   | Mean                                      | SD   | Mean                                                               | SD   |          |       |        |
| Suicidal Ideation Questionnaire | 38.3                | 20.7 | 56.0                                  | 22.4 | 54.9                                      | 26.9 | 48.5                                                               | 25.1 | F=10.47  | 3,324 | <0.001 |

*Corrected*

|                                 | No Event<br>(N=266) |      | Ideation or<br>Attempt Only<br>(N=37) |      | Nonsuicidal<br>Self-Injury only<br>(N=20) |      | Ideation or<br>Attempt and<br>Nonsuicidal<br>Self-Injury<br>(N=11) |      | Analysis |       |        |
|---------------------------------|---------------------|------|---------------------------------------|------|-------------------------------------------|------|--------------------------------------------------------------------|------|----------|-------|--------|
|                                 | Mean                | SD   | Mean                                  | SD   | Mean                                      | SD   | Mean                                                               | SD   |          |       |        |
| Suicidal Ideation Questionnaire | 23.5                | 20.7 | 41.0                                  | 22.4 | 39.9                                      | 26.9 | 33.5                                                               | 25.1 | F=10.47  | 3,324 | <0.001 |

3) Page 421

*Reported:* “those with nonsuicidal self-injury only compared to those with no events had higher suicidal ideation (54.9 [26.9] versus 38.3 (20.7),  $t=2.64$ ,  $df=19.6$ ,  $p=0.02$ )”

*Corrected:* “those with nonsuicidal self-injury only compared to those with no events had higher suicidal ideation (39.9 [26.9] versus 23.3 (20.7),  $t=2.64$ ,  $df=19.6$ ,  $p=0.02$ )”

4) Page 422

*Reported:* “meaning that participants with higher than median baseline suicidal ideation (Suicide Ideation Questionnaire score  $\geq 35$ )”

*Corrected:* “meaning that participants with higher than median baseline suicidal ideation (Suicide Ideation Questionnaire score  $\geq 20$ )”

*Reported*

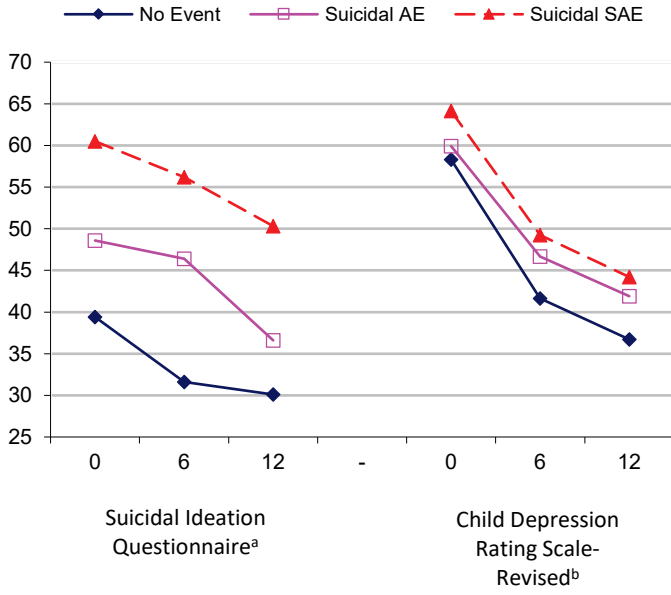

*Corrected*

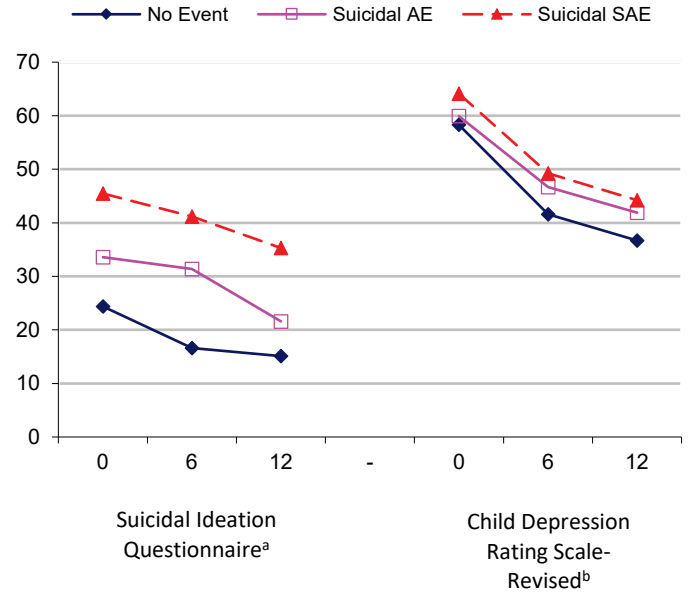

Supplement: ajp_08070976_correction01.pdf [file ajp_08070976_correction01.pdf]
